# Supplementary material for: Bioactive Amines in Wines. The Assessment of Quality Descriptors by Flow Injection Analysis with Tandem Mass Spectrometry
Source: MDPI journal article supplement (doi:10.3390/molecules27248690), 2022-12-08
Supplement: s1 [file s1]

# Bioactive Amines in Wines. Assessment of Quality Descriptors by Flow Injection Analysis with Tandem Mass Spectrometry

Aina Mir-Cerdà<sup>1,2</sup>, Javier Saurina<sup>1,2,\*</sup>, and Sònia Sentellas<sup>1,2,3</sup>

<sup>1</sup> Department of Chemical Engineering and Analytical Chemistry, Universitat de Barcelona. Martí i Franquès 1-11, E08028, Barcelona, Spain.

<sup>2</sup> Research Institute in Food Nutrition and Food Safety, Universitat de Barcelona, Recinte Torribera, Av. Prat de la Riba 171, Edifici de Recerca (Gaudi), Santa Coloma de Gramenet, E08921 Barcelona, Spain.

<sup>3</sup> Serra Hùnter Fellow Programme, Generalitat de Catalunya, Via Laietana 2, E-08003 Barcelona, Spain.

\* Correspondence: J.S. xavi.saurina@ub.edu

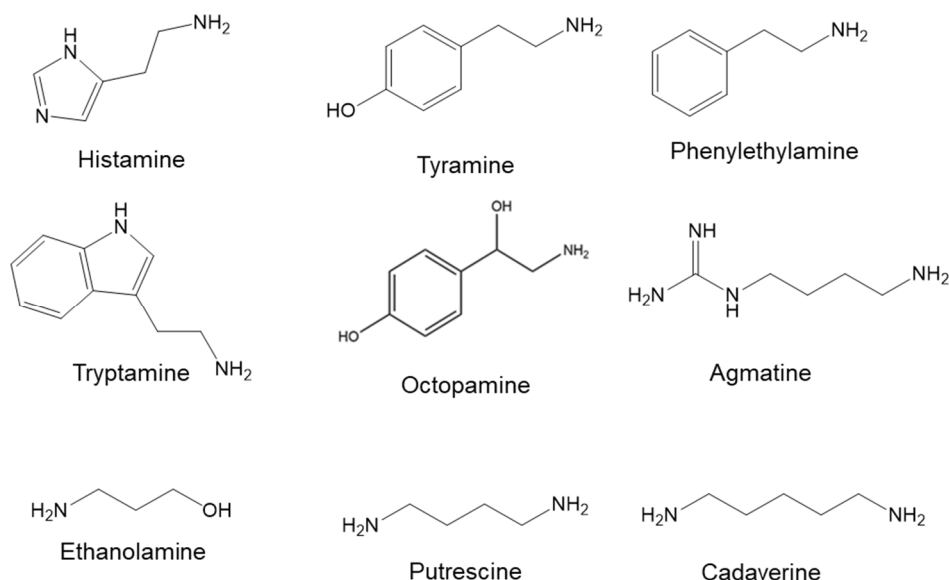

**Figure S1.** Structures of the biogenic amines determined in this study

Table S1. Analytical parameters of the proposed FIA-MS/MS method.

| Biogenic amine   | Linear range<br>(mg L <sup>-1</sup> ) | Sensitivity<br>(counts min L mg <sup>-1</sup> ) | Correlation<br>coefficient | LOD<br>(mg L <sup>-1</sup> ) | RSD<br>(%) |
|------------------|---------------------------------------|-------------------------------------------------|----------------------------|------------------------------|------------|
| Agmatine         | up to 5                               | 48600                                           | 0.997                      | 0.20                         | 9.8        |
| Cadaverine       | up to 10                              | 19980                                           | 0.990                      | 0.19                         | 6.8        |
| Ethanolamine     | up to 10                              | 38780                                           | 0.980                      | 0.71                         | 7.0        |
| Histamine        | up to 10                              | 305000                                          | 0.985                      | 0.88                         | 6.8        |
| Octopamine       | up to 10                              | 58000                                           | 0.990                      | 0.28                         | 6.6        |
| Phenylethylamine | up to 10                              | 63400                                           | 0.995                      | 0.12                         | 6.7        |
| Putrescine       | up to 25                              | 2342                                            | 0.990                      | 0.19                         | 8.1        |
| Tryptamine       | up to 10                              | 3274                                            | 0.985                      | 0.43                         | 6.8        |
| Tyramine         | up to 25                              | 9900                                            | 0.980                      | 0.74                         | 5.8        |

**Table S2.** Concentrations and standard deviations (n=3) of the analyzed biogenic amines in the set of samples determined by FIA-MS. Sample nomenclature: must (M), base wine (BW), stabilized wine (SW), sparkling wine (3 months aged, 3M), sparkling wine (7 months aged, 7M), A-type Pinot Noir (PA), B-type Pinot Noir (PB), C-type Pinot Noir (PC), D-type Pinot Noir (PD), A-type Xarel·lo (XA), B-type Xarel·lo (XB), C-type Xarel·lo (XC), and D-type Xarel·lo (XD).

| Sample type | Ethanolamine                   |      | Agmatine                       |      | Tryptamine                     |      | Phenylethylamine               |      | Putrescine                     |      | Cadaverine                     |      | Histamine                      |      | Octopamine                     |      | Tyramine                       |      |
|-------------|--------------------------------|------|--------------------------------|------|--------------------------------|------|--------------------------------|------|--------------------------------|------|--------------------------------|------|--------------------------------|------|--------------------------------|------|--------------------------------|------|
|             | Conc.<br>(mg L <sup>-1</sup> ) | s    |
| <b>MPA</b>  | 0.13                           | 0.07 | 0.11                           | 0.06 | 0.14                           | 0.01 | 0.03                           | 0.01 | 0.06                           | 0.00 | 0.06                           | 0.03 | 0.07                           | 0.02 | 0.10                           | 0.06 | 0.29                           | 0.25 |
| <b>BWPA</b> | 2.39                           | 0.14 | 0.90                           | 0.19 | 0.49                           | 0.07 | 0.49                           | 0.16 | 3.54                           | 1.44 | 0.41                           | 0.07 | 0.77                           | 0.20 | 1.68                           | 0.34 | 2.74                           | 0.31 |
| <b>SWPA</b> | 2.05                           | 0.12 | 0.98                           | 0.07 | 0.45                           | 0.10 | 0.38                           | 0.12 | 3.67                           | 0.18 | 0.34                           | 0.07 | 0.54                           | 0.11 | 1.44                           | 0.39 | 2.17                           | 0.65 |
| <b>3MPA</b> | 2.74                           | 0.36 | 0.54                           | 0.20 | 0.44                           | 0.02 | 0.13                           | 0.01 | 0.79                           | 0.30 | 0.15                           | 0.06 | 0.39                           | 0.14 | 0.71                           | 0.17 | 0.78                           | 0.18 |
| <b>7MPA</b> | 2.62                           | 0.47 | 0.39                           | 0.05 | 0.44                           | 0.02 | 0.09                           | 0.02 | 0.14                           | 0.02 | 0.12                           | 0.01 | 0.14                           | 0.06 | 0.49                           | 0.04 | 0.64                           | 0.09 |
| <b>MXA</b>  | 0.78                           | 0.15 | 0.53                           | 0.15 | 0.18                           | 0.03 | 0.04                           | 0.01 | 0.14                           | 0.04 | 0.23                           | 0.02 | 0.23                           | 0.08 | 0.54                           | 0.12 | 0.84                           | 0.41 |
| <b>BWXA</b> | 3.38                           | 0.47 | 1.00                           | 0.03 | 0.52                           | 0.14 | 0.49                           | 0.22 | 2.03                           | 0.48 | 0.43                           | 0.01 | 0.32                           | 0.04 | 1.62                           | 0.29 | 3.79                           | 1.04 |
| <b>SWXA</b> | 2.89                           | 1.04 | 0.91                           | 0.19 | 0.71                           | 0.09 | 0.45                           | 0.09 | 1.62                           | 0.44 | 0.31                           | 0.03 | 0.52                           | 0.32 | 1.33                           | 0.26 | 4.92                           | 2.51 |
| <b>3MXA</b> | 4.38                           | 1.89 | 0.58                           | 0.03 | 0.55                           | 0.11 | 0.10                           | 0.02 | 0.44                           | 0.10 | 0.16                           | 0.03 | 0.27                           | 0.02 | 0.77                           | 0.08 | 0.82                           | 0.13 |
| <b>7MXA</b> | 3.34                           | 0.26 | 0.47                           | 0.01 | 0.48                           | 0.10 | 0.09                           | 0.01 | 0.21                           | 0.01 | 0.12                           | 0.02 | 0.18                           | 0.05 | 0.76                           | 0.09 | 0.64                           | 0.15 |
| <b>MPB</b>  | 0.43                           | 0.29 | 0.44                           | 0.15 | 0.14                           | 0.01 | 0.04                           | 0.01 | 0.06                           | 0.03 | 0.09                           | 0.07 | 0.19                           | 0.09 | 0.31                           | 0.22 | 0.96                           | 0.63 |
| <b>BWPB</b> | 4.07                           | 0.14 | 1.39                           | 0.30 | 0.54                           | 0.05 | 0.63                           | 0.16 | 2.37                           | 0.41 | 0.80                           | 0.21 | 0.82                           | 0.18 | 2.54                           | 0.54 | 11.84                          | 2.83 |
| <b>SWPB</b> | 4.22                           | 0.33 | 1.06                           | 0.20 | 0.29                           | 0.13 | 0.47                           | 0.08 | 2.59                           | 0.43 | 0.44                           | 0.10 | 1.24                           | 0.32 | 1.58                           | 0.15 | 8.92                           | 2.14 |
| <b>3MPB</b> | 6.17                           | 0.13 | 0.65                           | 0.08 | 0.38                           | 0.05 | 0.16                           | 0.02 | 0.77                           | 0.13 | 0.19                           | 0.01 | 0.56                           | 0.05 | 0.89                           | 0.12 | 1.04                           | 0.01 |
| <b>7MPB</b> | 6.39                           | 0.70 | 0.39                           | 0.14 | 0.38                           | 0.05 | 0.08                           | 0.04 | 0.23                           | 0.08 | 0.13                           | 0.06 | 0.30                           | 0.10 | 0.79                           | 0.24 | 0.59                           | 0.23 |
| <b>MXB</b>  | 0.38                           | 0.11 | 0.20                           | 0.02 | 0.05                           | 0.08 | 0.02                           | 0.00 | 0.35                           | 0.07 | 0.07                           | 0.01 | 0.07                           | 0.05 | 0.19                           | 0.09 | 5.08                           | 2.61 |
| <b>BWXB</b> | 4.47                           | 0.42 | 0.85                           | 0.16 | 0.56                           | 0.05 | 0.53                           | 0.17 | 2.37                           | 0.10 | 0.39                           | 0.08 | 0.36                           | 0.05 | 1.44                           | 0.14 | 2.90                           | 0.48 |
| <b>SWXB</b> | 5.02                           | 0.60 | 1.02                           | 0.23 | 0.35                           | 0.07 | 1.15                           | 0.11 | 23.71                          | 3.51 | 2.09                           | 0.93 | 13.41                          | 4.70 | 2.29                           | 0.85 | 17.01                          | 6.48 |
| <b>3MXB</b> | 5.46                           | 1.03 | 0.42                           | 0.11 | 0.29                           | 0.03 | 0.09                           | 0.00 | 0.99                           | 0.37 | 0.16                           | 0.08 | 0.44                           | 0.19 | 0.40                           | 0.12 | 0.44                           | 0.05 |
| <b>7MXB</b> | 6.14                           | 2.14 | 0.28                           | 0.01 | 0.34                           | 0.14 | 0.08                           | 0.01 | 0.17                           | 0.04 | 0.07                           | 0.01 | 0.25                           | 0.12 | 0.38                           | 0.03 | 0.46                           | 0.06 |

|             |      |      |      |      |      |      |      |      |       |      |      |      |       |      |      |      |       |      |
|-------------|------|------|------|------|------|------|------|------|-------|------|------|------|-------|------|------|------|-------|------|
| <b>MPC</b>  | 1.06 | 0.03 | 0.48 | 0.18 | 0.05 | 0.08 | 0.08 | 0.01 | 0.24  | 0.13 | 0.18 | 0.07 | 0.26  | 0.16 | 0.58 | 0.19 | 1.21  | 0.56 |
| <b>BWPC</b> | 4.44 | 0.32 | 1.80 | 0.15 | 0.77 | 0.19 | 1.01 | 0.14 | 23.75 | 6.51 | 0.85 | 0.08 | 14.69 | 1.78 | 5.15 | 1.01 | 23.54 | 2.08 |
| <b>SWPC</b> | 4,19 | 0,38 | 1,01 | 0,10 | 0,32 | 0,04 | 0,61 | 0,11 | 9,81  | 3,20 | 0,60 | 0,10 | 6,70  | 0,90 | 2,01 | 0,44 | 11,42 | 2,54 |
| <b>3MPC</b> | 5,36 | 0,79 | 0,38 | 0,08 | 0,24 | 0,01 | 0,25 | 0,02 | 3,08  | 0,16 | 0,13 | 0,01 | 1,51  | 0,13 | 0,45 | 0,09 | 2,48  | 0,42 |
| <b>7MPC</b> | 6,07 | 0,57 | 0,28 | 0,06 | 0,24 | 0,01 | 0,22 | 0,05 | 0,95  | 0,99 | 0,12 | 0,06 | 0,63  | 0,58 | 0,46 | 0,05 | 1,97  | 0,55 |
| <b>MXC</b>  | 2,04 | 0,71 | 0,86 | 0,30 | 0,25 | 0,02 | 0,07 | 0,02 | 0,64  | 0,29 | 0,31 | 0,07 | 0,21  | 0,09 | 0,93 | 0,31 | 1,32  | 0,19 |
| <b>BWXC</b> | 4,74 | 0,61 | 0,92 | 0,49 | 0,45 | 0,04 | 0,76 | 0,37 | 7,72  | 5,22 | 1,16 | 0,61 | 4,98  | 2,91 | 2,09 | 1,28 | 14,69 | 4,33 |
| <b>SWXC</b> | 4,92 | 0,21 | 1,14 | 0,33 | 0,33 | 0,06 | 0,73 | 0,19 | 12,97 | 3,54 | 0,94 | 0,41 | 9,79  | 2,19 | 1,68 | 0,19 | 14,27 | 0,59 |
| <b>3MXC</b> | 6,57 | 0,80 | 0,46 | 0,02 | 0,31 | 0,02 | 0,28 | 0,01 | 2,57  | 0,35 | 0,19 | 0,03 | 1,41  | 0,38 | 0,47 | 0,01 | 1,43  | 0,29 |
| <b>7MXC</b> | 6,72 | 0,83 | 0,30 | 0,01 | 0,32 | 0,04 | 0,21 | 0,02 | 1,25  | 0,64 | 0,10 | 0,04 | 0,48  | 0,09 | 0,45 | 0,05 | 10,23 | 6,46 |
| <b>MPD</b>  | 0,80 | 0,26 | 0,53 | 0,10 | 0,15 | 0,01 | 0,07 | 0,03 | 0,20  | 0,07 | 0,15 | 0,01 | 0,29  | 0,16 | 0,58 | 0,07 | 1,19  | 0,38 |
| <b>BWPD</b> | 4,61 | 0,46 | 0,89 | 0,08 | 0,34 | 0,04 | 0,93 | 0,13 | 15,93 | 4,35 | 0,78 | 0,24 | 9,55  | 3,00 | 3,20 | 1,63 | 22,89 | 5,67 |
| <b>SWPD</b> | 4,61 | 0,28 | 0,96 | 0,04 | 0,28 | 0,03 | 1,14 | 0,07 | 22,91 | 2,90 | 1,04 | 0,18 | 16,66 | 5,58 | 3,97 | 0,83 | 31,89 | 2,85 |
| <b>3MPD</b> | 5,82 | 0,29 | 0,41 | 0,17 | 0,25 | 0,03 | 0,34 | 0,04 | 3,82  | 1,70 | 0,14 | 0,06 | 2,02  | 0,93 | 0,33 | 0,13 | 0,99  | 0,74 |
| <b>7MPD</b> | 6,28 | 0,69 | 0,38 | 0,03 | 0,25 | 0,03 | 0,28 | 0,04 | 0,49  | 0,08 | 0,08 | 0,01 | 0,44  | 0,14 | 0,43 | 0,03 | 2,84  | 2,36 |
| <b>MXD</b>  | 0,44 | 0,06 | 0,33 | 0,15 | 0,09 | 0,08 | 0,04 | 0,00 | 1,47  | 0,58 | 0,14 | 0,08 | 0,06  | 0,06 | 0,35 | 0,19 | 0,81  | 0,09 |
| <b>BWXD</b> | 4,80 | 0,70 | 0,74 | 0,34 | 0,54 | 0,03 | 0,68 | 0,29 | 6,03  | 1,31 | 0,15 | 0,09 | 4,34  | 3,29 | 1,11 | 0,71 | 11,42 | 1,19 |
| <b>SWXD</b> | 5,23 | 0,75 | 0,95 | 0,22 | 0,26 | 0,03 | 0,67 | 0,15 | 7,97  | 2,11 | 1,20 | 0,46 | 5,32  | 2,22 | 2,94 | 0,77 | 10,93 | 1,26 |
| <b>3MXD</b> | 7,03 | 0,46 | 0,39 | 0,05 | 0,30 | 0,02 | 0,25 | 0,00 | 2,09  | 0,82 | 0,18 | 0,06 | 1,42  | 0,43 | 0,44 | 0,08 | 1,19  | 0,61 |
| <b>7MXD</b> | 7,37 | 1,23 | 0,38 | 0,02 | 0,32 | 0,16 | 0,32 | 0,01 | 0,74  | 0,29 | 0,10 | 0,05 | 0,59  | 0,12 | 0,52 | 0,07 | 3,42  | 1,17 |

**Table S3.** Transitions for each analyte and the optimal values of declustering potential (DP), collision energy (CE), cell exit potential (CXP), and retention time of each analyte.

| Biogenic amine   | Q1 mass (Da) | Q3 mass (Da) | DP (V) | CE (V) | CXP (V) |
|------------------|--------------|--------------|--------|--------|---------|
| Agmatine         | 597.0        | 170.0        | 50     | 80     | 8       |
| Tyramine         | 604.0        | 234.0        | 90     | 40     | 8       |
| Phenylethylamine | 355.0        | 170.0        | 90     | 30     | 10      |
| Cadaverine       | 569.0        | 234.0        | 110    | 50     | 8       |
| Putrescine       | 555.0        | 234.0        | 120    | 60     | 12      |
| Histamine        | 578.0        | 234.0        | 80     | 40     | 12      |
| Tryptamine       | 394.0        | 234.0        | 60     | 40     | 10      |
| Spermidine       | 845.0        | 360.0        | 40     | 80     | 12      |
| Spermine         | 1135.6       | 360.0        | 90     | 50     | 10      |
| Octopamine       | 620.0        | 170.0        | 66     | 59     | 12      |
| Ethanolamine     | 295.0        | 170.0        | 120    | 60     | 12      |
